# Supplementary material for: Impact of IFNL4 Genetic Variants on Sustained Virologic Response and Viremia in Hepatitis C Virus Genotype 3 Patients
Source: PubMed Central journal article supplement (PMC6767867; doi:10.1089/jir.2019.0013), 2019-09-27
Supplement: Supp_Fig1.pdf [file Supp_Fig1.pdf]

## Supplementary Data

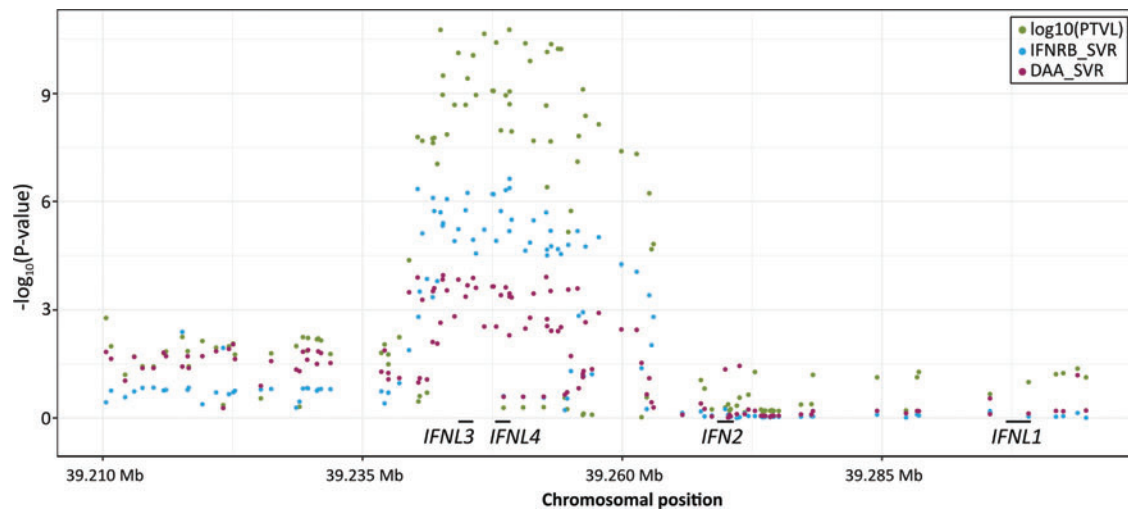

**SUPPLEMENTARY FIG. S1.** Regional plot of association between 114 SNPs in the *IFNL* locus and the three HCV related phenotypes [viral load  $\log_{10}(\text{PTVL})$ ; green dot]; response to peg-IFN- $\alpha$  and Ribavirin treatment (IFNRB\_SVR; blue dot) and to DAA treatment (DAA\_SVR; purple dot). DAA, direct-acting antiviral; HCV, hepatitis C virus; IFNL, interferon lambda; peg-IFN- $\alpha$ , pegylated interferon alpha; SNP, single nucleotide polymorphism; SVR, sustained virologic response.
