# Supplementary material for: Impact of IFNL4 Genetic Variants on Sustained Virologic Response and Viremia in Hepatitis C Virus Genotype 3 Patients
Source: PubMed Central journal article supplement (PMC6767867; doi:10.1089/jir.2019.0013), 2019-09-27
Supplement: Supp_Fig2.pdf [file Supp_Fig2.pdf]

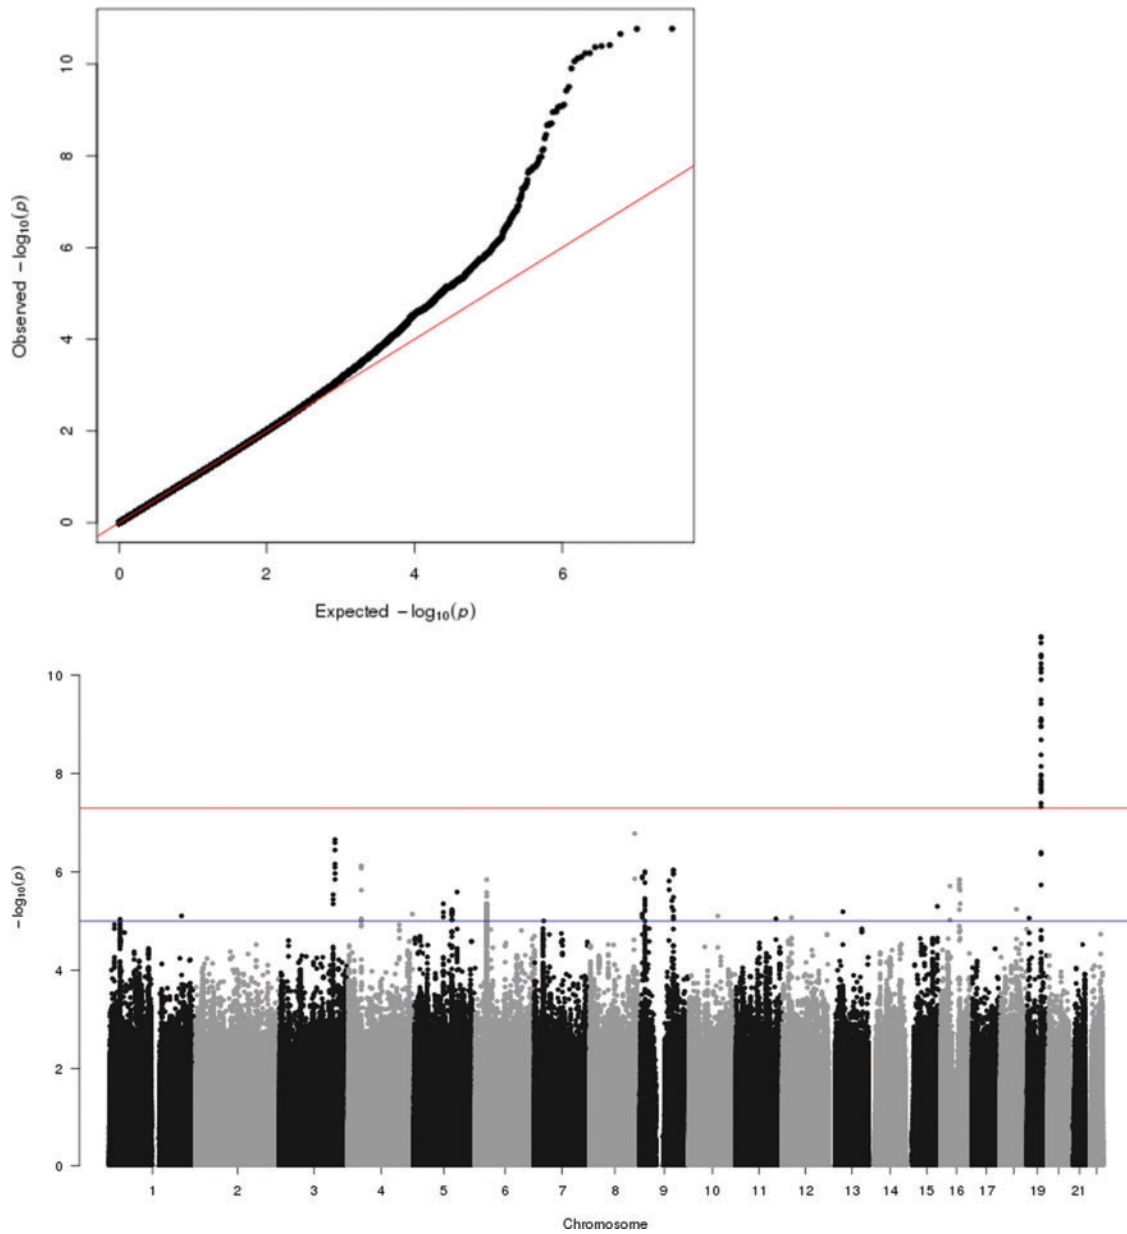

**SUPPLEMENTARY FIG. S2.** QQ plot and GWAS of  $\log_{10}(\text{PTVL})$ . GWAS, genome-wide association study; QQ, quantile-quantile.
