# Supplementary material for: Impact of IFNL4 Genetic Variants on Sustained Virologic Response and Viremia in Hepatitis C Virus Genotype 3 Patients
Source: PubMed Central journal article supplement (PMC6767867; doi:10.1089/jir.2019.0013), 2019-09-27
Supplement: Supp_Fig4.pdf [file Supp_Fig4.pdf]

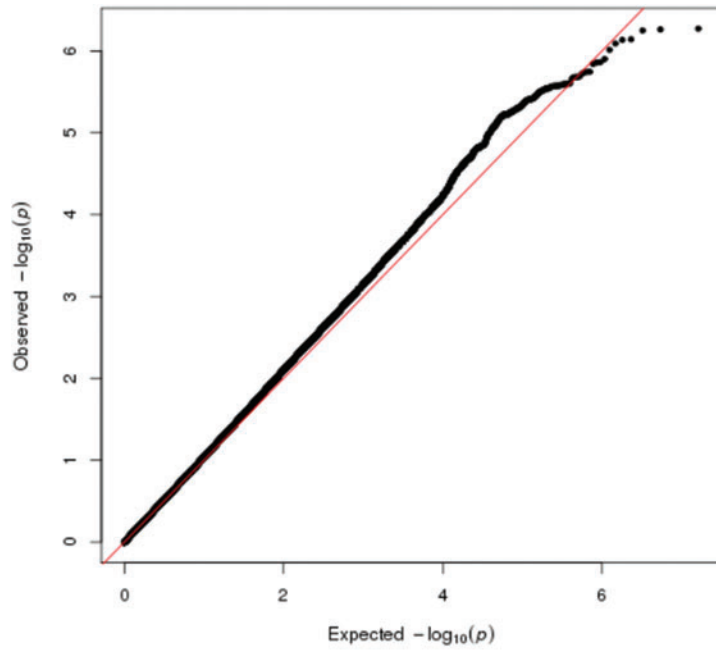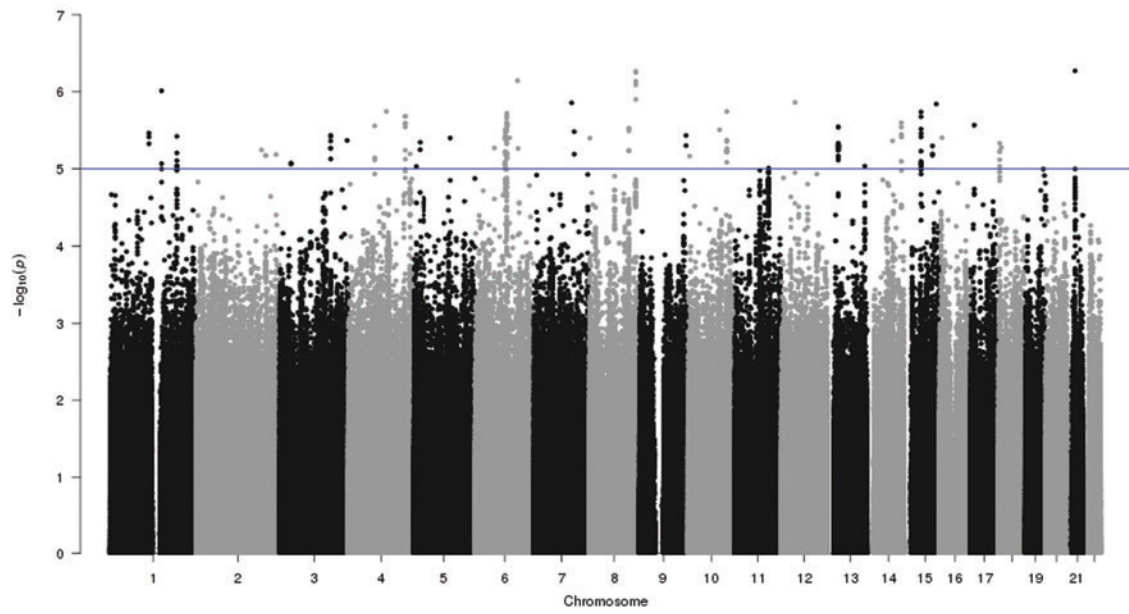

**SUPPLEMENTARY FIG. S4.** QQ plot and GWAS of DAA\_SVR.
