# Supplementary material for: Impact of IFNL4 Genetic Variants on Sustained Virologic Response and Viremia in Hepatitis C Virus Genotype 3 Patients
Source: PubMed Central journal article supplement (PMC6767867; doi:10.1089/jir.2019.0013), 2019-09-27
Supplement: Supp_Table1.pdf [file Supp_Table1.pdf]

SUPPLEMENTARY TABLE S1. GENETIC VARIANTS ASSOCIATED WITH HEPATOCELLULAR CARCINOMA, LIVER DISEASE (FIBROSIS), AND TREATMENT OUTCOME

| <i>Phenotype</i> | <i>SNP</i>  | <i>CHR</i> | <i>Gene</i>               | <i>Reference (DOI)</i>                  |
|------------------|-------------|------------|---------------------------|-----------------------------------------|
| HCC              | rs2228603   | 19         | <i>NCAN</i>               | 10.1016/j.jhep.2014.06.006              |
| HCC              | rs2596542   | 6          | <i>MICA</i>               | 10.1038/ng.809                          |
| HCC              | rs9275572   | 6          | <i>HLA-DQB1, HLA-DQA2</i> | 10.1038/ng.809                          |
| HCC              | rs2244546   | 6          | <i>HCP5/MICA</i>          | 10.1016/j.jhep.2013.04.032              |
| HCC              | rs1012068   | 22         | <i>DEPDC5</i>             | 10.1038/ng.876                          |
| Fibrosis         | rs7975232   | 12         | <i>VDR</i>                | 10.3851/IMP2018                         |
| Fibrosis         | rs731236    | 12         | <i>VDR</i>                | 10.3851/IMP2018                         |
| Fibrosis         | rs1544410   | 12         | <i>VDR</i>                | 10.3851/IMP2018                         |
| Fibrosis         | rs9380516   | 6          | <i>TULP1</i>              | 10.1053/j.gastro.2012.07.097            |
| Fibrosis         | rs886277    | 11         | <i>TRPM5</i>              | 10.1097/FPC.0b013e32834c3e74            |
| Fibrosis         | rs4986791   | 9          | <i>TLR4</i>               | 10.1097/FPC.0b013e32834c3e74            |
| Fibrosis         | rs17740066  | 3          | <i>STXBP5L</i>            | 10.1097/FPC.0b013e32834c3e74            |
| Fibrosis         | rs16851720  | 3          | <i>RNF7</i>               | 10.1053/j.gastro.2012.07.097            |
| Fibrosis         | rs738490    | 22         | <i>PNPLA3</i>             | 10.1002/hep.24350                       |
| Fibrosis         | rs4290029   | 1          | <i>NVL/DEGS1</i>          | 10.1097/FPC.0b013e32834c3e74            |
| Fibrosis         | rs4374383   | 2          | <i>MERTK</i>              | 10.1053/j.gastro.2012.07.097            |
| Fibrosis         | rs9976971   | 21         | <i>IFNGR2</i>             | 10.1136/gut.2009.202267                 |
| Fibrosis         | rs62522600  | 8          | <i>AZIN1</i>              | 10.1097/FPC.0b013e32834c3e74            |
| Fibrosis         | rs2878771   | 12         | <i>AQP2</i>               | 10.1097/FPC.0b013e32834c3e74            |
| Fibrosis         | rs2290351   | 15         | <i>AP3S2</i>              | 10.1097/FPC.0b013e32834c3e74            |
| Fibrosis         | rs2287622   | 2          | <i>ABCB11</i>             | 10.1016/j.jmoldx.2017.07.005            |
| Clearance        | rs6932345   | 6          | <i>SLC29A1</i>            | 10.1111/j.1478-3231.2011.02727.x        |
| Clearance        | rs10868138  | 9          | <i>SLC28A4</i>            | 10.1016/j.jhep.2012.11.027              |
| Clearance        | rs56350726  | 9          | <i>SLC28A3</i>            | 10.1016/j.jhep.2012.11.027              |
| Clearance        | rs11854484  | 15         | <i>SLC28A2</i>            | 10.1016/j.jhep.2012.11.027              |
| Clearance        | rs10846744  | 12         | <i>SCARB1</i>             | 10.1038/srep32303                       |
| Clearance        | rs3747517   | 2          | <i>MDA5</i>               | 10.1002/hep.27951                       |
| Clearance        | rs1990760   | 2          | <i>MDA5</i>               | 10.1002/hep.27951                       |
| Clearance        | rs7270101   | 20         | <i>ITPA</i>               | 10.1053/j.gastro.2010.06.071            |
| Clearance        | rs1127354   | 20         | <i>ITPA</i>               | 10.1053/j.gastro.2010.06.071            |
| Clearance        | rs8099917   | 19         | <i>IFNL4</i>              | 10.1038/ng.449                          |
| Clearance        | rs12979860  | 19         | <i>IFNL4</i>              | 10.1038/nature08463                     |
| Clearance        | rs368234815 | 19         | <i>IFNL4</i>              | 10.1038/ng.2521                         |
| Clearance        | rs117648444 | 19         | <i>IFNL4</i>              | 10.1016/j.jcv.2014.01.006               |
| Clearance        | rs7041      | 4          | <i>GC</i>                 | 10.1002/hep.25848                       |
| Clearance        | rs4588      | 4          | <i>GC</i>                 | 10.1002/hep.25848                       |
| Clearance        | rs4273729   | 6          | <i>DQB1*0301</i>          | 10.7326/0003-4819-158-4-201302190-00003 |
| Clearance        | rs10877012  | 12         | <i>CYP27B1-1260</i>       | 10.1016/j.jhep.2010.08.036              |

HCC, hepatocellular carcinoma; SNP, single nucleotide polymorphism.
