# Supplementary material for: Impact of IFNL4 Genetic Variants on Sustained Virologic Response and Viremia in Hepatitis C Virus Genotype 3 Patients
Source: PubMed Central journal article supplement (PMC6767867; doi:10.1089/jir.2019.0013), 2019-09-27
Supplement: Supp_Table2-3.pdf [file Supp_Table2-3.pdf]

SUPPLEMENTARY TABLE S2. TOP 25 MOST SIGNIFICANT ASSOCIATION SIGNALS WITH LOG<sub>10</sub>(PTVL)

| <i>Chromosome</i> | <i>SNP</i>  | <i>Position</i> | <i>Beta</i> | <i>P</i>                 |
|-------------------|-------------|-----------------|-------------|--------------------------|
| 19                | rs4803221   | 39739129        | -0.284517   | 1.70 × 10 <sup>-11</sup> |
| 19                | rs8105790   | 39732501        | -0.284387   | 1.71 × 10 <sup>-11</sup> |
| 19                | rs8107030   | 39736719        | -0.282882   | 2.21 × 10 <sup>-11</sup> |
| 19                | rs12971396  | 39737866        | -0.278785   | 3.86 × 10 <sup>-11</sup> |
| 19                | rs66531907  | 39740675        | -0.280237   | 4.05 × 10 <sup>-11</sup> |
| 19                | rs8099917   | 39743165        | -0.279478   | 4.29 × 10 <sup>-11</sup> |
| 19                | rs7248668   | 39743821        | -0.279242   | 5.77 × 10 <sup>-11</sup> |
| 19                | rs148241872 | 39744102        | -0.279622   | 5.84 × 10 <sup>-11</sup> |
| 19                | rs8109889   | 39742770        | -0.276533   | 7.07 × 10 <sup>-11</sup> |
| 19                | rs4803217   | 39734220        | -0.250839   | 7.51 × 10 <sup>-11</sup> |
| 19                | rs28416813  | 39735644        | -0.250354   | 8.74 × 10 <sup>-11</sup> |
| 19                | rs12983038  | 39741124        | -0.274573   | 1.24 × 10 <sup>-10</sup> |
| 19                | rs688187    | 39732752        | -0.241399   | 3.16 × 10 <sup>-10</sup> |
| 19                | rs8103142   | 39735106        | -0.238468   | 3.81 × 10 <sup>-10</sup> |
| 19                | rs4803223   | 39746219        | -0.276579   | 7.69 × 10 <sup>-10</sup> |
| 19                | rs73930703  | 39737513        | -0.234871   | 8.34 × 10 <sup>-10</sup> |
| 19                | rs11882871  | 39737610        | -0.234824   | 8.45 × 10 <sup>-10</sup> |
| 19                | rs74597329  | 39739155        | -0.234411   | 8.76 × 10 <sup>-10</sup> |
| 19                | rs8105086   | 39732712        | -0.235516   | 1.08 × 10 <sup>-09</sup> |
| 19                | rs201690073 | 39735919        | -0.239132   | 1.10 × 10 <sup>-09</sup> |
| 19                | rs12979860  | 39738787        | -0.233061   | 1.12 × 10 <sup>-09</sup> |
| 19                | rs11322783  | 39739153        | -0.229632   | 1.97 × 10 <sup>-09</sup> |
| 19                | rs71169578  | 39733855        | -0.237898   | 2.06 × 10 <sup>-09</sup> |
| 19                | rs11881222  | 39734923        | -0.232485   | 2.07 × 10 <sup>-09</sup> |
| 19                | rs10642535  | 39742683        | -0.232779   | 2.16 × 10 <sup>-09</sup> |

PTVL, pretreatment viral load.

SUPPLEMENTARY TABLE S3. TOP 25 MOST SIGNIFICANT ASSOCIATION SIGNALS WITH IFNRB\_SVR

| <i>Chromosome</i> | <i>SNP</i>  | <i>Position</i> | <i>Odds ratio</i> | <i>P</i>                 |
|-------------------|-------------|-----------------|-------------------|--------------------------|
| 19                | rs74597329  | 39739155        | 1.50464           | 2.35 × 10 <sup>-07</sup> |
| 19                | rs11322783  | 39739153        | 1.49242           | 4.26 × 10 <sup>-07</sup> |
| 19                | rs958039    | 39730301        | 1.50693           | 4.52 × 10 <sup>-07</sup> |
| 19                | rs12979860  | 39738787        | 1.49587           | 4.86 × 10 <sup>-07</sup> |
| 19                | rs8103142   | 39735106        | 1.49587           | 5.79 × 10 <sup>-07</sup> |
| 19                | rs73930703  | 39737513        | 1.49046           | 6.25 × 10 <sup>-07</sup> |
| 19                | rs11882871  | 39737610        | 1.49022           | 6.32 × 10 <sup>-07</sup> |
| 19                | rs12980275  | 39731783        | 1.52543           | 8.00 × 10 <sup>-07</sup> |
| 19                | rs581930    | 39733123        | 1.50699           | 8.65 × 10 <sup>-07</sup> |
| 19                | rs11881222  | 39734923        | 1.48465           | 1.76 × 10 <sup>-06</sup> |
| 19                | rs111531283 | 39738317        | 1.47817           | 1.85 × 10 <sup>-06</sup> |
| 19                | rs12982533  | 39731904        | 1.49966           | 1.85 × 10 <sup>-06</sup> |
| 19                | rs8105790   | 39732501        | 1.5773            | 2.01 × 10 <sup>-06</sup> |
| 19                | rs10642535  | 39742683        | 1.46942           | 2.02 × 10 <sup>-06</sup> |
| 19                | rs4803222   | 39739353        | 1.45804           | 3.24 × 10 <sup>-06</sup> |
| 19                | rs68018539  | 39741465        | 1.47432           | 3.37 × 10 <sup>-06</sup> |
| 19                | rs688187    | 39732752        | 1.4619            | 4.02 × 10 <sup>-06</sup> |
| 19                | rs8105086   | 39732712        | 1.45723           | 4.73 × 10 <sup>-06</sup> |
| 19                | rs4803217   | 39734220        | 1.44677           | 5.91 × 10 <sup>-06</sup> |
| 19                | rs8107030   | 39736719        | 1.53369           | 6.13 × 10 <sup>-06</sup> |
| 19                | rs8113007   | 39743103        | 1.45679           | 6.57 × 10 <sup>-06</sup> |
| 19                | rs35963157  | 39745695        | 1.45599           | 6.68 × 10 <sup>-06</sup> |
| 19                | rs4803221   | 39739129        | 1.53479           | 6.69 × 10 <sup>-06</sup> |
| 19                | rs35790907  | 39730755        | 1.45092           | 7.77 × 10 <sup>-06</sup> |
| 19                | rs8101517   | 39747741        | 1.44529           | 9.90 × 10 <sup>-06</sup> |

SVR, sustained virologic response.
