# Supplementary material for: Impact of IFNL4 Genetic Variants on Sustained Virologic Response and Viremia in Hepatitis C Virus Genotype 3 Patients
Source: PubMed Central journal article supplement (PMC6767867; doi:10.1089/jir.2019.0013), 2019-09-27
Supplement: Supp_Table4-5.pdf [file Supp_Table4-5.pdf]

SUPPLEMENTARY TABLE S4. TOP 25 MOST SIGNIFICANT ASSOCIATION SIGNALS WITH DAA\_SVR

| <i>Chromosome</i> | <i>SNP</i>  | <i>Position</i> | <i>Odds ratio</i> | <i>P</i>               |
|-------------------|-------------|-----------------|-------------------|------------------------|
| 19                | rs688187    | 39732752        | 1.82              | $1.08 \times 10^{-04}$ |
| 19                | rs10642535  | 39742683        | 1.77              | $1.22 \times 10^{-04}$ |
| 19                | rs958039    | 39730301        | 1.76              | $1.25 \times 10^{-04}$ |
| 19                | rs28416813  | 39735644        | 1.80              | $1.29 \times 10^{-04}$ |
| 19                | rs8105086   | 39732712        | 1.81              | $1.43 \times 10^{-04}$ |
| 19                | rs4803217   | 39734220        | 1.79              | $1.43 \times 10^{-04}$ |
| 19                | rs8103142   | 39735106        | 1.75              | $2.07 \times 10^{-04}$ |
| 19                | rs11882871  | 39737610        | 1.74              | $2.23 \times 10^{-04}$ |
| 19                | rs73930703  | 39737513        | 1.74              | $2.24 \times 10^{-04}$ |
| 19                | rs12979860  | 39738787        | 1.74              | $2.36 \times 10^{-04}$ |
| 19                | rs201690073 | 39735919        | 1.79              | $2.43 \times 10^{-04}$ |
| 19                | rs12982533  | 39731904        | 1.79              | $2.49 \times 10^{-04}$ |
| 19                | rs35963157  | 39745695        | 1.68              | $2.53 \times 10^{-04}$ |
| 19                | rs10612351  | 39744806        | 1.65              | $2.72 \times 10^{-04}$ |
| 19                | rs581930    | 39733123        | 1.77              | $2.86 \times 10^{-04}$ |
| 19                | rs8113007   | 39743103        | 1.75              | $2.97 \times 10^{-04}$ |
| 19                | rs12980275  | 39731783        | 1.77              | $3.01 \times 10^{-04}$ |
| 19                | rs955155    | 39729479        | 1.73              | $3.23 \times 10^{-04}$ |
| 19                | rs11322783  | 39739153        | 1.69              | $3.50 \times 10^{-04}$ |
| 19                | rs68018539  | 39741465        | 1.74              | $3.51 \times 10^{-04}$ |
| 19                | rs111531283 | 39738317        | 1.74              | $3.88 \times 10^{-04}$ |
| 19                | rs74597329  | 39739155        | 1.68              | $4.24 \times 10^{-04}$ |
| 19                | rs11881222  | 39734923        | 1.74              | $4.28 \times 10^{-04}$ |
| 19                | rs4803222   | 39739353        | 1.73              | $4.48 \times 10^{-04}$ |
| 19                | rs35790907  | 39730755        | 1.69              | $5.23 \times 10^{-04}$ |

DAA, direct-acting antiviral.

SUPPLEMENTARY TABLE S5. TOP 25 MOST SIGNIFICANT GWAS ASSOCIATION SIGNALS WITH LOG<sub>10</sub>(PTVL)

| <i>Chromosome</i> | <i>SNP</i>  | <i>Position</i> | <i>Beta</i> | <i>P</i>               |
|-------------------|-------------|-----------------|-------------|------------------------|
| 19                | rs4803221   | 39739129        | -0.284517   | $1.70 \times 10^{-11}$ |
| 19                | rs8105790   | 39732501        | -0.284387   | $1.71 \times 10^{-11}$ |
| 19                | rs8107030   | 39736719        | -0.282882   | $2.21 \times 10^{-11}$ |
| 19                | rs12971396  | 39737866        | -0.278785   | $3.86 \times 10^{-11}$ |
| 19                | rs66531907  | 39740675        | -0.280237   | $4.05 \times 10^{-11}$ |
| 19                | rs8099917   | 39743165        | -0.279478   | $4.29 \times 10^{-11}$ |
| 19                | rs7248668   | 39743821        | -0.279242   | $5.77 \times 10^{-11}$ |
| 19                | rs148241872 | 39744102        | -0.279622   | $5.84 \times 10^{-11}$ |
| 19                | rs8109889   | 39742770        | -0.276533   | $7.07 \times 10^{-11}$ |
| 19                | rs4803217   | 39734220        | -0.250839   | $7.51 \times 10^{-11}$ |
| 19                | rs28416813  | 39735644        | -0.250354   | $8.74 \times 10^{-11}$ |
| 19                | rs12983038  | 39741124        | -0.274573   | $1.24 \times 10^{-10}$ |
| 19                | rs688187    | 39732752        | -0.241399   | $3.16 \times 10^{-10}$ |
| 19                | rs8103142   | 39735106        | -0.238468   | $3.81 \times 10^{-10}$ |
| 19                | rs4803223   | 39746219        | -0.276579   | $7.69 \times 10^{-10}$ |
| 19                | rs73930703  | 39737513        | -0.234871   | $8.34 \times 10^{-10}$ |
| 19                | rs11882871  | 39737610        | -0.234824   | $8.45 \times 10^{-10}$ |
| 19                | rs74597329  | 39739155        | -0.234411   | $8.76 \times 10^{-10}$ |
| 19                | rs8105086   | 39732712        | -0.235516   | $1.08 \times 10^{-09}$ |
| 19                | rs201690073 | 39735919        | -0.239132   | $1.10 \times 10^{-09}$ |
| 19                | rs12979860  | 39738787        | -0.233061   | $1.12 \times 10^{-09}$ |
| 19                | rs11322783  | 39739153        | -0.229632   | $1.97 \times 10^{-09}$ |
| 19                | rs71169578  | 39733855        | -0.237898   | $2.06 \times 10^{-09}$ |
| 19                | rs11881222  | 39734923        | -0.232485   | $2.07 \times 10^{-09}$ |
| 19                | rs10642535  | 39742683        | -0.232779   | $2.16 \times 10^{-09}$ |

GWAS, genome-wide association study.
