# Supplementary material for: Impact of IFNL4 Genetic Variants on Sustained Virologic Response and Viremia in Hepatitis C Virus Genotype 3 Patients
Source: PubMed Central journal article supplement (PMC6767867; doi:10.1089/jir.2019.0013), 2019-09-27
Supplement: Supp_Table6-7.pdf [file Supp_Table6-7.pdf]

SUPPLEMENTARY TABLE S6. TOP 25 MOST SIGNIFICANT GWAS ASSOCIATION SIGNALS WITH IFNRB\_SVR

| <i>Chromosome</i> | <i>SNP</i>  | <i>Position</i> | <i>Odds ratio</i> | <i>P</i>               |
|-------------------|-------------|-----------------|-------------------|------------------------|
| 19                | rs74597329  | 39739155        | 1.59              | $2.35 \times 10^{-07}$ |
| 3                 | rs6445096   | 172780967       | 1.57              | $2.97 \times 10^{-07}$ |
| 19                | rs958039    | 39730301        | 1.58              | $4.52 \times 10^{-07}$ |
| 19                | rs12979860  | 39738787        | 1.57              | $4.86 \times 10^{-07}$ |
| 3                 | rs6445097   | 172781729       | 1.56              | $4.95 \times 10^{-07}$ |
| 4                 | rs76755915  | 97959607        | 0.22              | $5.06 \times 10^{-07}$ |
| 3                 | rs9833380   | 172780363       | 1.56              | $5.16 \times 10^{-07}$ |
| 3                 | rs12635576  | 172777249       | 1.56              | $5.22 \times 10^{-07}$ |
| 3                 | rs2861067   | 172783277       | 1.56              | $5.35 \times 10^{-07}$ |
| 19                | rs8103142   | 39735106        | 1.56              | $5.79 \times 10^{-07}$ |
| 3                 | rs1113587   | 172783511       | 1.56              | $6.25 \times 10^{-07}$ |
| 19                | rs73930703  | 39737513        | 1.56              | $6.25 \times 10^{-07}$ |
| 19                | rs11882871  | 39737610        | 1.56              | $6.32 \times 10^{-07}$ |
| 3                 | rs6781476   | 172774448       | 1.54              | $7.88 \times 10^{-07}$ |
| 3                 | rs7645546   | 172782231       | 1.55              | $7.94 \times 10^{-07}$ |
| 19                | rs12980275  | 39731783        | 1.55              | $8.00 \times 10^{-07}$ |
| 19                | rs581930    | 39733123        | 1.56              | $8.65 \times 10^{-07}$ |
| 2                 | rs13401937  | 55252214        | 1.94              | $8.81 \times 10^{-07}$ |
| 6                 | rs2492965   | 73155175        | 0.35              | $1.05 \times 10^{-06}$ |
| 4                 | rs78736235  | 97948861        | 0.22              | $1.06 \times 10^{-06}$ |
| 13                | rs7332270   | 35431953        | 0.61              | $1.25 \times 10^{-06}$ |
| 12                | rs75707332  | 22174937        | 2.56              | $1.28 \times 10^{-06}$ |
| 5                 | rs72799981  | 142530386       | 6.64              | $1.43 \times 10^{-06}$ |
| 19                | rs11881222  | 39734923        | 1.54              | $1.76 \times 10^{-06}$ |
| 19                | rs111531283 | 39738317        | 1.54              | $1.85 \times 10^{-06}$ |

SUPPLEMENTARY TABLE S7. TOP 25 MOST SIGNIFICANT GWAS ASSOCIATION SIGNALS WITH DAA\_SVR

| <i>Chromosome</i> | <i>SNP</i>  | <i>Position</i> | <i>Odds ratio</i> | <i>P</i>               |
|-------------------|-------------|-----------------|-------------------|------------------------|
| 21                | rs35384524  | 22389690        | 0.28              | $5.35 \times 10^{-07}$ |
| 8                 | rs59888390  | 136001312       | 0.26              | $5.45 \times 10^{-07}$ |
| 8                 | rs66485405  | 136002315       | 0.26              | $5.63 \times 10^{-07}$ |
| 6                 | rs56378326  | 122991423       | 0.00              | $7.19 \times 10^{-07}$ |
| 8                 | rs6578047   | 136009494       | 0.26              | $7.33 \times 10^{-07}$ |
| 8                 | rs7833239   | 135981618       | 0.26              | $8.11 \times 10^{-07}$ |
| 1                 | rs116399066 | 149217804       | 6.39              | $9.70 \times 10^{-07}$ |
| 8                 | rs72724379  | 135989141       | 0.27              | $1.25 \times 10^{-06}$ |
| 7                 | rs76810409  | 109096452       | 0.00              | $1.39 \times 10^{-06}$ |
| 15                | rs62042908  | 93849243        | 2.56              | $1.44 \times 10^{-06}$ |
| 4                 | rs7670514   | 111133368       | 2.40              | $1.80 \times 10^{-06}$ |
| 15                | rs12323963  | 49231111        | 2.75              | $1.83 \times 10^{-06}$ |
| 6                 | rs57030374  | 91840403        | 3.72              | $1.90 \times 10^{-06}$ |
| 6                 | rs9362832   | 91840004        | 3.71              | $2.05 \times 10^{-06}$ |
| 4                 | rs10023300  | 165766741       | 2.43              | $2.08 \times 10^{-06}$ |
| 4                 | rs10011468  | 165766739       | 2.43              | $2.08 \times 10^{-06}$ |
| 15                | rs60658076  | 49228615        | 2.70              | $2.10 \times 10^{-06}$ |
| 6                 | rs9362827   | 91835828        | 3.67              | $2.20 \times 10^{-06}$ |
| 6                 | rs9362833   | 91840612        | 3.62              | $2.50 \times 10^{-06}$ |
| 6                 | rs9359924   | 91839956        | 3.62              | $2.53 \times 10^{-06}$ |
| 4                 | rs13131247  | 165767001       | 2.39              | $2.54 \times 10^{-06}$ |
| 6                 | rs9359923   | 91839622        | 3.61              | $2.55 \times 10^{-06}$ |
| 6                 | rs9353796   | 91840664        | 3.62              | $2.60 \times 10^{-06}$ |
| 4                 | rs4337691   | 165761928       | 2.51              | $2.60 \times 10^{-06}$ |
| 6                 | rs6936521   | 91838828        | 3.59              | $2.65 \times 10^{-06}$ |
